# Supplementary material for: Flexible band gap tuning of hexagonal boron nitride sheets interconnected by acetylenic bonds
Source: Royal Society of Chemistry journal article supplement (doi:10.1039/c5cp02346g), 2015-01-01
Supplement: c5cp02346g1.pdf [file c5cp02346g1.pdf]

## Supplementary Information

### Flexible band gap tuning of hexagonal boron nitride sheets interconnected by acetylenic bonds

Hongyu Zhang,\* Youhua Luo,\* Xiaojuan Feng, Lixia Zhao and Meng Zhang

Department of Physics, East China University of Science and Technology, Shanghai

200237, China

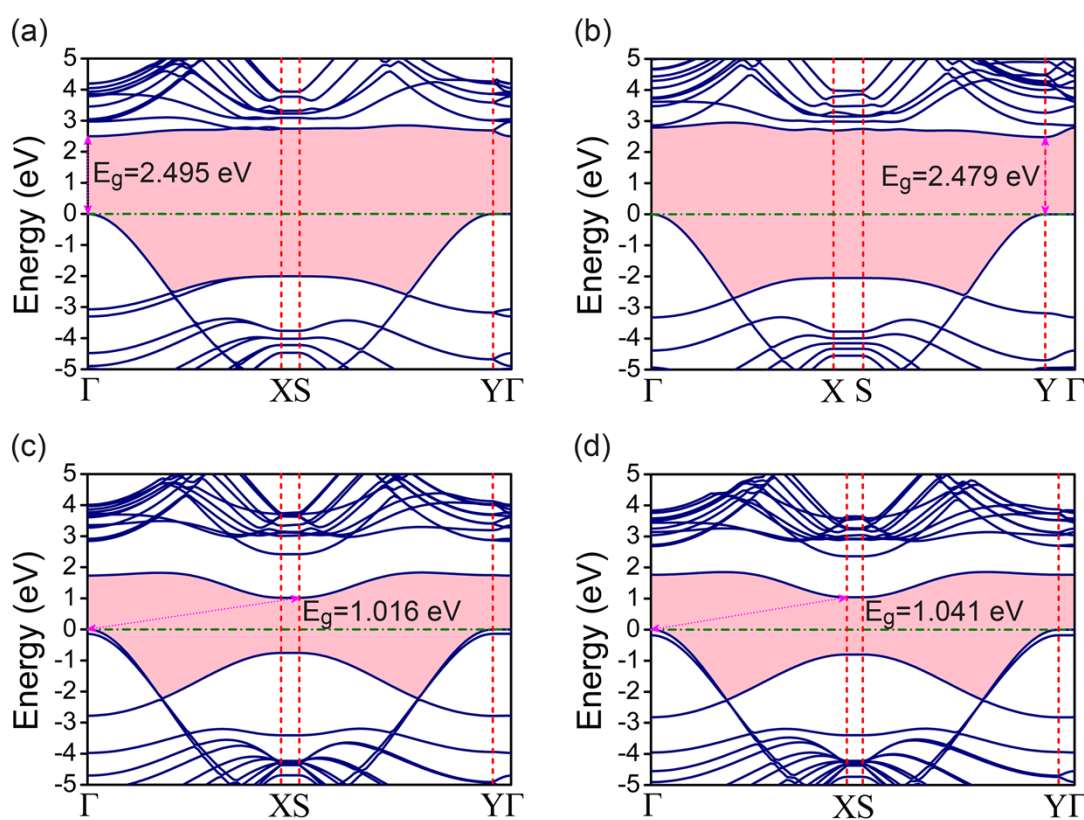

**Fig. S1** Band structures of (a) 4-BNyne-Type I, (b) 5-BNyne-Type I, (c) 4-BNyne-Type II, (d) 5-BNyne-Type II obtained by using HSE06 hybrid functional. The horizontal dash-dot lines indicate the Fermi level.
